# Supplementary material
Source: publisher figshare collection journal article supplement (https://acs.figshare.com/ndownloader/files/5822217)
Supplement: Supplementary file 1 [file 5822217]

## Supplementary Materials

### 1. Detailed Experimental Section

**Chemicals.** Lyophilized horse heart myoglobin was from Sigma. Cytochrome P450cam (MW 46500) from *Pseudomonas Putida* expressed in *E. coli* DH52 $\alpha$  containing P450cam cDNA was isolated and purified as described previously.<sup>3</sup> Camphor-free cytochrome P450 was prepared immediately before use by passing a solution of the enzyme through a Sephadex C-15 column equilibrated with 50 mM TRIS·HCl buffer (pH 7.4) containing 100 mM KCl at 4 °C. After this procedure, the electronic absorption peak (Soret band) shifted from 392 nm for camphor-bound cytochrome P450cam to 416 nm for substrate-free cytochrome P450cam. Didodecyldimethylammonium bromide (DDAB) was 99+% from Eastman. Polyions were sodium poly(styrenesulfonate) (PSS, MW 70,000, Aldrich, poly(dimethyldiallylammonium chloride) (PDDA, Aldrich). Styrene, styrene oxide, benzaldehyde and phenylpropylene oxide (methylstyrene oxide) were from Aldrich. Cis- $\beta$ -methylstyrene was from Farchan Laboratories. Hydrogen peroxide (30%) was from J. T. Baker. All other chemicals were reagent grade. The buffer was 50 mM TRIS·HCl buffer (pH 7.4) containing 100 mM KCl.

**Apparatus and Procedures.** Cyclic voltammetry was done as described previously.<sup>3,4</sup> A vapor deposited gold disk on a quartz crystal resonator<sup>4</sup> or a basal plane pyrolytic graphite (PG) disk (Union Carbide HPG-99, A = 0.2 cm<sup>2</sup>) served as working electrode. PG electrodes were polished on a metallographic polishing wheel on billiard cloth with a 0.3  $\mu$ m alumina dispersion for 2 min, followed by 1 min ultrasonication in pure water. The electrode was cooled with water while polishing with alumina. Then the electrode was ultrasonicated for 0.5-1.0 min in pure

water. The resulting mirror-like surface was wiped with a Kimwipe before use, either for coating or as a bare electrode.

Controlled potential electrolysis was done using a PARC 273 electrochemical analyzer or a BAS 100B electrochemical analyzer. Water jacketed, separated three-electrode cells were equipped with a Vycor tipped saturated calomel reference electrode (SCE), a Pt foil ( $1 \times 5$  cm) counter electrode, and a carbon cloth ( $1.5 \times 6$  cm, National Electrical Carbon Corp.) working electrode or a Au ( $1 \times 5$  cm) working electrode. The counter electrode was separated from reaction solutions by a saturated KCl-agar bridge. Au electrodes were coated with protein-polyion films and carbon cloth electrodes were coated with protein-surfactant films.

Protein-polyion films were prepared as described previously.<sup>4</sup> Au electrodes were first cleaned in  $\text{HNO}_3/\text{HCl}/\text{H}_2\text{O}$  (1/3/4) for 20 seconds, then ultrasonicated in ethanol/KOH/ $\text{H}_2\text{O}$  (40/1/59) for 1 min. The cleaned Au electrode was immersed in 1 mM MPS in ethanol for 16 hours. It was then exposed to appropriate protein or polyion solutions ( $3 \text{ mg mL}^{-1}$ ) for 20 min. to obtain the desired layers.<sup>4</sup> Electrodes were rinsed then dried with  $\text{N}_2$  between formation of any two layers.

Protein-surfactant films were prepared by soaking carbon cloth electrodes in a 5 mM DDAB aqueous vesicle dispersion containing 0.25 mM Mb or a 2 mM DDAB dispersion containing 30  $\mu\text{M}$  cytochrome P450cam. Water was evaporated in air overnight.

Electrochemical oxidations of styrene and cis- $\beta$ -methylstyrene were mediated by myoglobin or cyt P450cam in films in 4 mL of 0.05 mM TRIS-HCl buffer containing 0.1 M KCl (pH 7.4) saturated with styrene or cis- $\beta$ -methylstyrene (ca. 10 mM). Control reactions were

done on bare carbon cloth and gold electrodes with 80  $\mu$ M myoglobin or 7  $\mu$ M cytochrome P450 in solutions. The working electrode potential was -0.60 V vs. SCE. Chemical oxidations of styrene and *cis*- $\beta$ -methylstyrene were done by adding hydrogen peroxide to solutions identical to those used for electrolysis. For experiments under oxygen, pure oxygen was bubbled through the reaction mixture for the first 1/3 of the reaction time, then shut off. Vigorous or prolonged bubbling with oxygen decreased styrene oxide yields.

Product mixtures were analyzed using a Hewlett-Packard Model 6890 gas chromatograph with a flame ionization detector and an HP-1 fused silica capillary column (0.53 mm i.d.  $\times$  10 m). Column temperature was programmed to hold at 50  $^{\circ}$ C for 2 minutes and then rise 15  $^{\circ}$ C/min to 250  $^{\circ}$ C. Average retention times were 6.0 min for styrene, 6.8 min for benzaldehyde, 8.3 min for styrene oxide, 7.5 min for *cis*- $\beta$ -methylstyrene, 7.9 min for *trans*- $\beta$ -methylstyrene, 8.9 min for *cis*- $\beta$ -methylstyrene oxide, and 9.0 min for *trans*- $\beta$ -methylstyrene oxide.

Mass spectra were obtained with a Hewlett-Packard GC-MS which has an HP 5790 quadrupole mass detector attached to an HP 5890 GC with an HP-1 column, with same conditions described above. A 0.5-mL aliquot was removed from reaction mixture after each reaction. The aliquot was extracted with 0.5 mL of  $\text{CH}_2\text{Cl}_2$ . The extraction mixture was centrifuged for about 20 minutes to make two clear layers. The  $\text{CH}_2\text{Cl}_2$  layer was analyzed by gas chromatography. This procedure gave 98% recovery.

Styrene oxide, *cis*- $\beta$ -methylstyrene oxide and *trans*- $\beta$ -methylstyrene oxide were identified by comparing retention times with authentic standards. Identities were confirmed by GC-MS. Quantitative determinations were carried out with standard curves using phenylpropylene oxide

as internal standard for styrene oxide and using styrene oxide as internal standard for *cis*- and *trans*- $\beta$ -methylstyrene oxides.

UV-VIS spectra were measured with a Perkin Elmer Lambda 6 UV-Visible spectrophotometer. Hydrogen peroxide was estimated by using Quantofix Peroxide 100 test sticks (Macherey-Nagel GmbH & Co., Germany).

## 2. Supplementary Figure

**Figure 1S.** Cyclic voltammograms at  $0.2 \text{ V s}^{-1}$  of Au-MPS-(PDDA-cyt P450)<sub>2</sub> in pH 7.4 TRIS buffer all anaerobic under Argon showing decreases in cyt P450 reduction-oxidation peaks after electrolysis: (a) before using for electrolysis; (b) after 1 hr electrolysis at  $4^\circ\text{C}$  and  $-0.6 \text{ V}$  vs SCE in saturated styrene buffer open to air; and (c) after 1 hr at  $4^\circ\text{C}$  and  $-0.6 \text{ V}$  vs. SCE in saturated styrene buffer under oxygen.

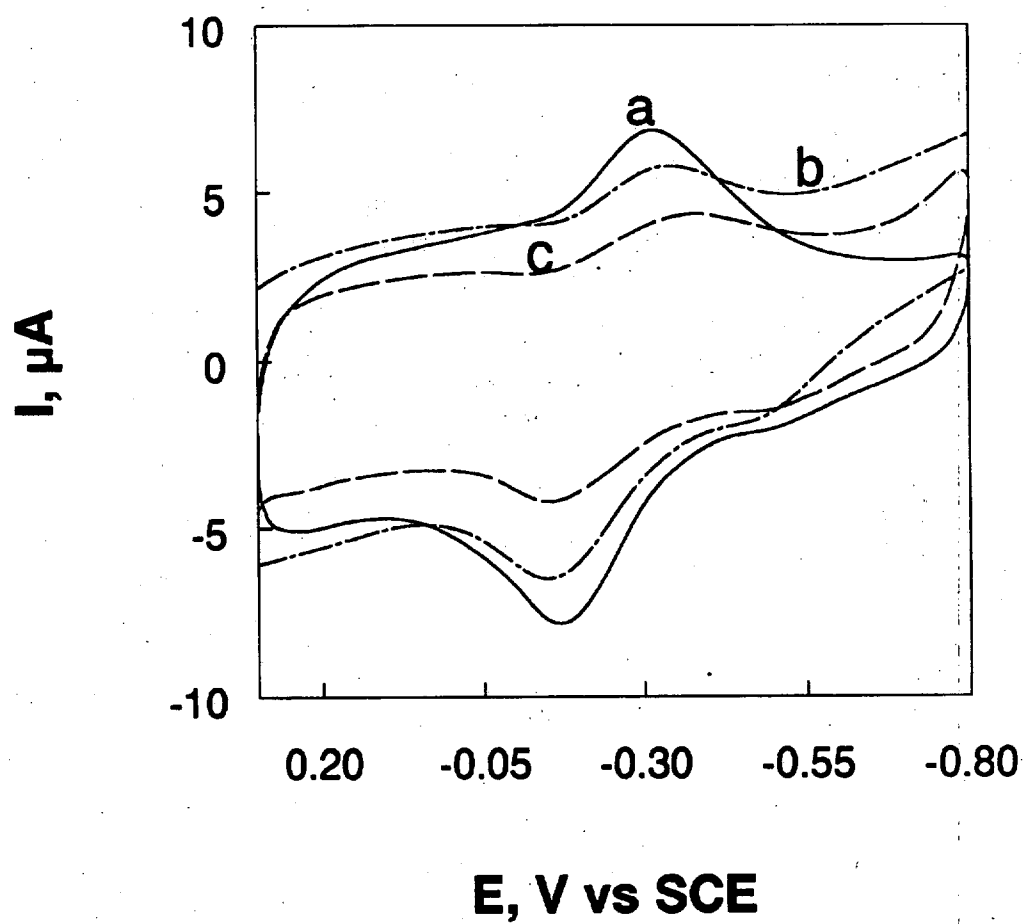

Fig. 15
